# Supplementary material
Source: publisher site journal article supplement (https://www.spandidos-publications.com/633/downloadSupplementary)

Figure S1. Determination of sulforaphane gene targets by RT-qPCR. Cal27, HSC-2 and HSC-3 cells were treated for 8 h with 10  $\mu$ M SF, followed by analysis of RNA expression for the indicated genes using RT-qPCR. Gene expression in sulforaphane- and vehicle-treated cells was compared using ANOVA followed by Bonferroni's method. Error bars represent the standard deviation of triplicate assays. \*P<0.05 and \*\*P<0.01 vs. vehicle control. RT-qPCR, reverse transcription-quantitative PCR; HMOX1, heme oxygenase 1; HSPA1A, heat shock protein family A (Hsp70) member 1A; SF, sulforaphane.

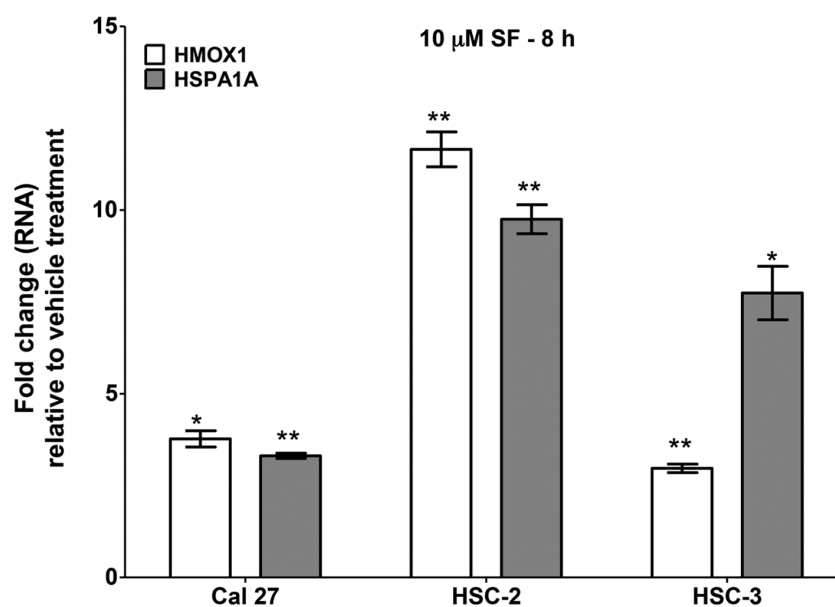

Supplement: Supplementary file 1 [file downloadSupplementary]
